# Supplementary material for: Crystal chemistry and magnetic properties of the solid solutions Ca14−xRExMnBi11 (RE = La–Nd, Sm, and Gd–Ho; x ≈ 0.6–0.8)
Source: Royal Society of Chemistry journal article supplement (doi:10.1039/c7dt03715e), 2017-01-01
Supplement: c7dt03715e1.pdf [file c7dt03715e1.pdf]

# Supporting Information

---

## Crystal chemistry and magnetic properties of the solid solutions $\text{Ca}_{14-x}\text{RE}_x\text{MnBi}_{11}$ ( $\text{RE} = \text{La-Nd, Sm, Gd-Ho}$ ; $x \approx 0.6-0.8$ )

Alexander Ovchinnikov, Jai Prakash, and Svilen Bobev

Table S1 Atomic coordinates and equivalent isotropic displacement parameters for  $\text{Ca}_{13.18}\text{Ce}_{0.82}\text{MnBi}_{11}$

| Atom                 | Site        | $x$        | $y$        | $z$        | $U_{\text{eq}}^{\text{a}}$ |
|----------------------|-------------|------------|------------|------------|----------------------------|
| Ca1/Ce1 <sup>b</sup> | 32 <i>d</i> | 0.0412(1)  | 0.0736(1)  | 0.17164(8) | 0.0146(7)                  |
| Ca2/Ce2 <sup>b</sup> | 32 <i>d</i> | 0.02286(9) | 0.37639(9) | 0.00273(8) | 0.0179(7)                  |
| Ca3/Ce3 <sup>b</sup> | 16 <i>e</i> | 0.3532(2)  | 0          | 1/4        | 0.015(1)                   |
| Ca4/Ce4 <sup>b</sup> | 32 <i>c</i> | 0.3411(1)  | 0.0727(1)  | 0.09276(8) | 0.0189(8)                  |
| Mn1                  | 8 <i>a</i>  | 0          | 1/4        | 3/8        | 0.0142(6)                  |
| Bi1                  | 16 <i>f</i> | 0.13835(2) | 0.38835(2) | 1/8        | 0.0132(1)                  |
| Bi2                  | 32 <i>g</i> | 0.35865(2) | 0.25576(2) | 0.05972(2) | 0.0141(1)                  |
| Bi3                  | 32 <i>g</i> | 0.12967(2) | 0.02732(2) | 0.04677(2) | 0.0146(1)                  |
| Bi4                  | 8 <i>b</i>  | 0          | 1/4        | 1/8        | 0.0134(2)                  |

<sup>a</sup> $U_{\text{eq}}$  is defined as one third of the trace of the orthogonalized  $U_{ij}$  tensor.

<sup>b</sup>Refined occupancies: Ca1/Ce1 = 0.958(4)Ca + 0.042Ce; Ca2/Ce2 = 0.878(4)Ca + 0.122Ce; Ca3/Ce3 = 0.982(5)Ca + 0.018Ce; Ca4/Ce4 = 0.967(4)Ca + 0.033Ce.

Table S2 Atomic coordinates and equivalent isotropic displacement parameters for  $\text{Ca}_{13.34}\text{Pr}_{0.66}\text{MnBi}_{11}$

| Atom                 | Site        | $x$        | $y$        | $z$        | $U_{\text{eq}}^{\text{a}}$ |
|----------------------|-------------|------------|------------|------------|----------------------------|
| Ca1/Pr1 <sup>b</sup> | 32 <i>d</i> | 0.0412(1)  | 0.0738(1)  | 0.17178(7) | 0.0109(6)                  |
| Ca2/Pr2 <sup>b</sup> | 32 <i>d</i> | 0.0234(1)  | 0.37642(9) | 0.00310(7) | 0.0135(6)                  |
| Ca3/Pr3 <sup>b</sup> | 16 <i>e</i> | 0.3533(2)  | 0          | 1/4        | 0.0112(8)                  |
| Ca4/Pr4 <sup>b</sup> | 32 <i>c</i> | 0.3412(1)  | 0.0723(1)  | 0.09272(7) | 0.0148(6)                  |
| Mn1                  | 8 <i>a</i>  | 0          | 1/4        | 3/8        | 0.0100(6)                  |
| Bi1                  | 16 <i>f</i> | 0.13842(2) | 0.38842(2) | 1/8        | 0.0088(1)                  |
| Bi2                  | 32 <i>g</i> | 0.35868(2) | 0.25588(2) | 0.05973(2) | 0.0099(1)                  |
| Bi3                  | 32 <i>g</i> | 0.12963(2) | 0.02732(2) | 0.04683(2) | 0.0104(1)                  |
| Bi4                  | 8 <i>b</i>  | 0          | 1/4        | 1/8        | 0.0091(2)                  |

<sup>a</sup> $U_{\text{eq}}$  is defined as one third of the trace of the orthogonalized  $U_{ij}$  tensor.

<sup>b</sup>Refined occupancies: Ca1/Pr1 = 0.954(4)Ca + 0.046Pr; Ca2/Pr2 = 0.920(4)Ca + 0.080Pr; Ca3/Pr3 = 0.974(5)Ca + 0.026Pr; Ca4/Pr4 = 0.973(4)Ca + 0.027Pr.

Table S3 Atomic coordinates and equivalent isotropic displacement parameters for  $\text{Ca}_{13.36}\text{Nd}_{0.64}\text{MnBi}_{11}$

| Atom                 | Site        | $x$        | $y$        | $z$        | $U_{\text{eq}}^{\text{a}}$ |
|----------------------|-------------|------------|------------|------------|----------------------------|
| Ca1/Nd1 <sup>b</sup> | 32 <i>d</i> | 0.04120(9) | 0.07361(9) | 0.17157(8) | 0.0083(5)                  |
| Ca2/Nd2 <sup>b</sup> | 32 <i>d</i> | 0.0234(1)  | 0.3766(1)  | 0.00356(9) | 0.0123(6)                  |
| Ca3/Nd3 <sup>b</sup> | 16 <i>e</i> | 0.3529(2)  | 0          | 1/4        | 0.0098(9)                  |
| Ca4/Nd4 <sup>b</sup> | 32 <i>c</i> | 0.3413(1)  | 0.0723(1)  | 0.09254(9) | 0.0135(7)                  |
| Mn1                  | 8 <i>a</i>  | 0          | 1/4        | 3/8        | 0.0098(6)                  |
| Bi1                  | 16 <i>f</i> | 0.13848(2) | 0.38848(2) | 1/8        | 0.0077(1)                  |
| Bi2                  | 32 <i>g</i> | 0.35876(2) | 0.25588(2) | 0.05959(2) | 0.0087(1)                  |
| Bi3                  | 32 <i>g</i> | 0.12964(2) | 0.02733(2) | 0.04689(2) | 0.0090(1)                  |
| Bi4                  | 8 <i>b</i>  | 0          | 1/4        | 1/8        | 0.0082(2)                  |

<sup>a</sup> $U_{\text{eq}}$  is defined as one third of the trace of the orthogonalized  $U_{ij}$  tensor.

<sup>b</sup>Refined occupancies: Ca1/Nd1 = 0.947(4)Ca + 0.053Nd; Ca2/Nd2 = 0.935(4)Ca + 0.065Nd; Ca3/Nd3 = 0.970(5)Ca + 0.030Nd; Ca4/Nd4 = 0.973(4)Ca + 0.027Nd.

Table S4 Atomic coordinates and equivalent isotropic displacement parameters for  $\text{Ca}_{13.38}\text{Sm}_{0.62}\text{MnBi}_{11}$

| Atom                 | Site        | $x$        | $y$        | $z$        | $U_{\text{eq}}^{\text{a}}$ |
|----------------------|-------------|------------|------------|------------|----------------------------|
| Ca1/Sm1 <sup>b</sup> | 32 <i>d</i> | 0.0410(1)  | 0.0736(1)  | 0.1716(8)  | 0.0135(6)                  |
| Ca2/Sm2 <sup>b</sup> | 32 <i>d</i> | 0.0236(1)  | 0.3766(1)  | 0.0036(1)  | 0.0159(7)                  |
| Ca3/Sm3 <sup>b</sup> | 16 <i>e</i> | 0.3530(2)  | 0          | 1/4        | 0.013(1)                   |
| Ca4/Sm4 <sup>b</sup> | 32 <i>c</i> | 0.3414(1)  | 0.0728(1)  | 0.0926(1)  | 0.0178(8)                  |
| Mn1                  | 8 <i>a</i>  | 0          | 1/4        | 3/8        | 0.0132(6)                  |
| Bi1                  | 16 <i>f</i> | 0.13854(2) | 0.38854(2) | 1/8        | 0.0115(2)                  |
| Bi2                  | 32 <i>g</i> | 0.35861(2) | 0.25598(2) | 0.05957(2) | 0.0127(1)                  |
| Bi3                  | 32 <i>g</i> | 0.12966(2) | 0.02744(2) | 0.04697(2) | 0.0133(1)                  |
| Bi4                  | 8 <i>b</i>  | 0          | 1/4        | 1/8        | 0.0120(2)                  |

<sup>a</sup> $U_{\text{eq}}$  is defined as one third of the trace of the orthogonalized  $U_{ij}$  tensor.

<sup>b</sup>Refined occupancies: Ca1/Sm1 = 0.930(4)Ca + 0.070Sm; Ca2/Sm2 = 0.956(5)Ca + 0.044Sm; Ca3/Sm3 = 0.962(6)Ca + 0.038Sm; Ca4/Sm4 = 0.977(4)Ca + 0.023Sm.

Table S5 Atomic coordinates and equivalent isotropic displacement parameters for  $\text{Ca}_{13.38}\text{Gd}_{0.62}\text{MnBi}_{11}$

| Atom                 | Site        | $x$        | $y$        | $z$        | $U_{\text{eq}}^{\text{a}}$ |
|----------------------|-------------|------------|------------|------------|----------------------------|
| Ca1/Gd1 <sup>b</sup> | 32 <i>d</i> | 0.04102(9) | 0.07380(9) | 0.17134(7) | 0.0099(6)                  |
| Ca2/Gd2 <sup>b</sup> | 32 <i>d</i> | 0.0237(1)  | 0.3766(1)  | 0.00386(9) | 0.0134(7)                  |
| Ca3/Gd3 <sup>b</sup> | 16 <i>e</i> | 0.3527(1)  | 0          | 1/4        | 0.0092(8)                  |
| Ca4/Gd4 <sup>b</sup> | 32 <i>c</i> | 0.3413(1)  | 0.0724(1)  | 0.09259(8) | 0.0129(7)                  |
| Mn1                  | 8 <i>a</i>  | 0          | 1/4        | 3/8        | 0.0099(6)                  |
| Bi1                  | 16 <i>f</i> | 0.13857(2) | 0.38857(2) | 1/8        | 0.0084(1)                  |
| Bi2                  | 32 <i>g</i> | 0.35854(2) | 0.25602(2) | 0.05952(2) | 0.0096(1)                  |
| Bi3                  | 32 <i>g</i> | 0.12972(2) | 0.02748(2) | 0.04704(2) | 0.0101(1)                  |
| Bi4                  | 8 <i>b</i>  | 0          | 1/4        | 1/8        | 0.0089(2)                  |

<sup>a</sup> $U_{\text{eq}}$  is defined as one third of the trace of the orthogonalized  $U_{ij}$  tensor.

<sup>b</sup>Refined occupancies: Ca1/Gd1 = 0.917(4)Ca + 0.083Gd; Ca2/Gd2 = 0.970(4)Ca + 0.030Gd; Ca3/Gd3 = 0.948(5)Ca + 0.052Gd; Ca4/Gd4 = 0.982(4)Ca + 0.018Gd.

Table S6 Atomic coordinates and equivalent isotropic displacement parameters for  $\text{Ca}_{13.30}\text{Tb}_{0.70}\text{MnBi}_{11}$

| Atom                 | Site        | $x$        | $y$        | $Z$        | $U_{\text{eq}}^{\text{a}}$ |
|----------------------|-------------|------------|------------|------------|----------------------------|
| Ca1/Tb1 <sup>b</sup> | 32 <i>d</i> | 0.0406(1)  | 0.0738(1)  | 0.17141(7) | 0.0115(6)                  |
| Ca2/Tb2 <sup>b</sup> | 32 <i>d</i> | 0.0239(1)  | 0.3768(1)  | 0.00400(9) | 0.0145(8)                  |
| Ca3/Tb3 <sup>b</sup> | 16 <i>e</i> | 0.3526(2)  | 0          | 1/4        | 0.0092(9)                  |
| Ca4/Tb4 <sup>b</sup> | 32 <i>c</i> | 0.3412(1)  | 0.0724(1)  | 0.09239(9) | 0.0147(8)                  |
| Mn1                  | 8 <i>a</i>  | 0          | 1/4        | 3/8        | 0.0102(7)                  |
| Bi1                  | 16 <i>f</i> | 0.13858(2) | 0.38858(2) | 1/8        | 0.0088(2)                  |
| Bi2                  | 32 <i>g</i> | 0.35846(2) | 0.25600(3) | 0.05936(2) | 0.0102(1)                  |
| Bi3                  | 32 <i>g</i> | 0.12974(3) | 0.02751(2) | 0.04712(2) | 0.0109(1)                  |
| Bi4                  | 8 <i>b</i>  | 0          | 1/4        | 1/8        | 0.0091(2)                  |

<sup>a</sup> $U_{\text{eq}}$  is defined as one third of the trace of the orthogonalized  $U_{ij}$  tensor.

<sup>b</sup>Refined occupancies: Ca1/Tb1 = 0.893(4)Ca + 0.107Tb; Ca2/Tb2 = 0.977(4)Ca + 0.023Tb; Ca3/Tb3 = 0.948(5)Ca + 0.052Tb; Ca4/Tb4 = 0.982(4)Ca + 0.018Tb.

Table S7 Atomic coordinates and equivalent isotropic displacement parameters for Ca<sub>13.31</sub>Dy<sub>0.69</sub>MnBi<sub>11</sub>

| Atom                 | Site        | <i>x</i>   | <i>y</i>   | <i>Z</i>   | $U_{\text{eq}}^{\text{a}}$ |
|----------------------|-------------|------------|------------|------------|----------------------------|
| Ca1/Dy1 <sup>b</sup> | 32 <i>d</i> | 0.04058(8) | 0.07382(8) | 0.17117(6) | 0.0137(5)                  |
| Ca2/Dy2 <sup>b</sup> | 32 <i>d</i> | 0.0240(1)  | 0.3767(1)  | 0.00383(9) | 0.0171(7)                  |
| Ca3/Dy3 <sup>b</sup> | 16 <i>e</i> | 0.3525(1)  | 0          | 1/4        | 0.0109(7)                  |
| Ca4/Dy4 <sup>b</sup> | 32 <i>c</i> | 0.3416(1)  | 0.0726(1)  | 0.09256(8) | 0.0156(7)                  |
| Mn1                  | 8 <i>a</i>  | 0          | 1/4        | 3/8        | 0.0129(6)                  |
| Bi1                  | 16 <i>f</i> | 0.13856(2) | 0.38856(2) | 1/8        | 0.0114(1)                  |
| Bi2                  | 32 <i>g</i> | 0.35839(2) | 0.25605(2) | 0.05932(2) | 0.0130(1)                  |
| Bi3                  | 32 <i>g</i> | 0.12981(2) | 0.02767(2) | 0.04723(2) | 0.0137(1)                  |
| Bi4                  | 8 <i>b</i>  | 0          | 1/4        | 1/8        | 0.0115(2)                  |

<sup>a</sup> $U_{\text{eq}}$  is defined as one third of the trace of the orthogonalized  $U_{ij}$  tensor.

<sup>b</sup>Refined occupancies: Ca1/Dy1 = 0.883(3)Ca + 0.117Dy; Ca2/Dy2 = 0.983(3)Ca + 0.017Dy; Ca3/Dy3 = 0.944(4)Ca + 0.056Dy; Ca4/Dy4 = 0.990(3)Ca + 0.010Dy.

Table S8 Atomic coordinates and equivalent isotropic displacement parameters for Ca<sub>13.36</sub>Ho<sub>0.64</sub>MnBi<sub>11</sub>

| Atom                 | Site        | <i>x</i>   | <i>y</i>   | <i>Z</i>   | $U_{\text{eq}}^{\text{a}}$ |
|----------------------|-------------|------------|------------|------------|----------------------------|
| Ca1/Ho1 <sup>b</sup> | 32 <i>d</i> | 0.04043(8) | 0.07392(8) | 0.17117(6) | 0.0132(5)                  |
| Ca2/Ho2 <sup>b</sup> | 32 <i>d</i> | 0.0236(1)  | 0.3767(1)  | 0.00387(9) | 0.0169(7)                  |
| Ca3/Ho3 <sup>b</sup> | 16 <i>e</i> | 0.3527(1)  | 0          | 1/4        | 0.0120(7)                  |
| Ca4/Ho4 <sup>b</sup> | 32 <i>c</i> | 0.3411(1)  | 0.0726(1)  | 0.09245(8) | 0.0173(7)                  |
| Mn1                  | 8 <i>a</i>  | 0          | 1/4        | 3/8        | 0.0131(6)                  |
| Bi1                  | 16 <i>f</i> | 0.13861(2) | 0.38861(2) | 1/8        | 0.0114(1)                  |
| Bi2                  | 32 <i>g</i> | 0.35832(2) | 0.25605(2) | 0.05947(2) | 0.0130(1)                  |
| Bi3                  | 32 <i>g</i> | 0.12990(2) | 0.02769(2) | 0.04723(2) | 0.0137(1)                  |
| Bi4                  | 8 <i>b</i>  | 0          | 1/4        | 1/8        | 0.0114(2)                  |

<sup>a</sup> $U_{\text{eq}}$  is defined as one third of the trace of the orthogonalized  $U_{ij}$  tensor.

<sup>b</sup>Refined occupancies: Ca1/Ho1 = 0.896(3)Ca + 0.104Ho; Ca2/Ho2 = 0.988(3)Ca + 0.012Ho; Ca3/Ho3 = 0.944(4)Ca + 0.056Ho; Ca4/Ho4 = 0.986(3)Ca + 0.014Ho.



Table S9 Atomic coordinates and equivalent isotropic displacement parameters for  $\text{Ca}_{13.83}\text{Er}_{0.17}\text{MnBi}_{11}$ 

| Atom                 | Site        | $x$        | $Y$        | $Z$        | $U_{\text{eq}}^{\text{a}}$ |
|----------------------|-------------|------------|------------|------------|----------------------------|
| Ca1/Er1 <sup>b</sup> | 32 <i>d</i> | 0.0408(1)  | 0.0740(1)  | 0.17166(8) | 0.0118(6)                  |
| Ca2/Er2 <sup>b</sup> | 32 <i>d</i> | 0.0237(1)  | 0.3766(1)  | 0.0033(1)  | 0.0138(8)                  |
| Ca3/Er3 <sup>b</sup> | 16 <i>e</i> | 0.3531(2)  | 0          | 1/4        | 0.0100(9)                  |
| Ca4/Er4 <sup>b</sup> | 32 <i>c</i> | 0.3411(1)  | 0.0726(1)  | 0.09269(9) | 0.0141(7)                  |
| Mn1                  | 8 <i>a</i>  | 0          | 1/4        | 3/8        | 0.0099(6)                  |
| Bi1                  | 16 <i>f</i> | 0.13869(2) | 0.38869(2) | 1/8        | 0.0095(1)                  |
| Bi2                  | 32 <i>g</i> | 0.35835(2) | 0.25615(2) | 0.06014(2) | 0.0107(1)                  |
| Bi3                  | 32 <i>g</i> | 0.12992(2) | 0.02754(2) | 0.04706(2) | 0.0112(1)                  |
| Bi4                  | 8 <i>b</i>  | 0          | 1/4        | 1/8        | 0.0099(2)                  |

<sup>a</sup> $U_{\text{eq}}$  is defined as one third of the trace of the orthogonalized  $U_{ij}$  tensor.

<sup>b</sup>Refined occupancies: Ca1/Er1 = 0.968(3)Ca + 0.032Er; Ca2/Er2 = 0.999(3)Ca + 0.001Er; Ca3/Er3 = 0.985(4)Ca + 0.015Er; Ca4/Er4 = 0.998(3)Ca + 0.002Er.

Table S10 Selected interatomic distances (Å) for  $\text{Ca}_{14-x}\text{RE}_x\text{MnBi}_{11}$ 

|                 | Ce        | Pr        | Nd        | Sm        | Gd        | Tb        | Dy        | Ho        | Er        |
|-----------------|-----------|-----------|-----------|-----------|-----------|-----------|-----------|-----------|-----------|
| Ca1/RE1—Bi2     | 3.236(2)  | 3.236(2)  | 3.237(2)  | 3.231(2)  | 3.230(2)  | 3.229(2)  | 3.227(1)  | 3.227(1)  | 3.233(2)  |
| Ca1/RE1—Bi4     | 3.262(2)  | 3.257(2)  | 3.260(2)  | 3.256(2)  | 3.247(2)  | 3.249(2)  | 3.244(1)  | 3.243(1)  | 3.251(2)  |
| Ca1/RE1—Bi2     | 3.266(2)  | 3.260(2)  | 3.268(2)  | 3.262(2)  | 3.263(2)  | 3.261(2)  | 3.264(1)  | 3.265(1)  | 3.265(2)  |
| Ca1/RE1—Bi3     | 3.273(2)  | 3.268(2)  | 3.271(2)  | 3.269(2)  | 3.263(2)  | 3.270(2)  | 3.267(1)  | 3.269(1)  | 3.270(2)  |
| Ca1/RE1—Bi3     | 3.287(2)  | 3.285(2)  | 3.285(2)  | 3.281(2)  | 3.273(2)  | 3.280(2)  | 3.272(1)  | 3.274(1)  | 3.281(2)  |
| Ca1/RE1—Bi1     | 3.301(2)  | 3.298(2)  | 3.300(2)  | 3.294(2)  | 3.289(2)  | 3.286(2)  | 3.281(1)  | 3.279(1)  | 3.294(2)  |
| Ca2/RE2—Bi2     | 3.208(2)  | 3.201(2)  | 3.207(2)  | 3.204(2)  | 3.201(2)  | 3.204(2)  | 3.198(2)  | 3.206(2)  | 3.206(2)  |
| Ca2/RE2—Bi3     | 3.231(2)  | 3.232(2)  | 3.230(2)  | 3.228(2)  | 3.225(2)  | 3.228(2)  | 3.229(2)  | 3.226(2)  | 3.237(2)  |
| Ca2/RE2—Bi3     | 3.344(2)  | 3.337(2)  | 3.342(2)  | 3.339(2)  | 3.337(2)  | 3.336(2)  | 3.338(2)  | 3.344(2)  | 3.342(2)  |
| Ca2/RE2—Bi1     | 3.391(2)  | 3.376(2)  | 3.373(2)  | 3.367(2)  | 3.359(2)  | 3.357(2)  | 3.359(2)  | 3.362(2)  | 3.370(2)  |
| Ca2/RE2—Bi4     | 3.518(2)  | 3.509(2)  | 3.508(2)  | 3.503(2)  | 3.495(2)  | 3.500(2)  | 3.500(2)  | 3.499(2)  | 3.506(2)  |
| Ca2/RE2—Bi2     | 3.859(2)  | 3.866(2)  | 3.872(2)  | 3.873(2)  | 3.872(2)  | 3.881(2)  | 3.877(2)  | 3.876(2)  | 3.883(2)  |
| Ca3/RE3—Bi3 × 2 | 3.205(2)  | 3.203(2)  | 3.201(2)  | 3.200(2)  | 3.193(2)  | 3.195(2)  | 3.193(2)  | 3.196(2)  | 3.203(2)  |
| Ca3/RE3—Bi2 × 2 | 3.320(2)  | 3.314(2)  | 3.321(2)  | 3.313(2)  | 3.311(2)  | 3.313(2)  | 3.311(2)  | 3.310(2)  | 3.314(2)  |
| Ca3/RE3—Bi1 × 2 | 3.4014(2) | 3.396(4)  | 3.4016(3) | 3.3968(3) | 3.3932(3) | 3.3975(3) | 3.3961(3) | 3.3955(3) | 3.3912(3) |
| Ca4/RE4—Bi2     | 3.222(2)  | 3.226(2)  | 3.228(2)  | 3.219(2)  | 3.222(2)  | 3.224(2)  | 3.219(2)  | 3.220(2)  | 3.225(2)  |
| Ca4/RE4—Bi1     | 3.245(2)  | 3.233(2)  | 3.236(2)  | 3.238(2)  | 3.227(2)  | 3.230(2)  | 3.230(2)  | 3.232(2)  | 3.234(2)  |
| Ca4/RE4—Bi3     | 3.275(2)  | 3.270(2)  | 3.273(2)  | 3.273(2)  | 3.270(2)  | 3.272(2)  | 3.275(2)  | 3.274(2)  | 3.269(2)  |
| Ca4/RE4—Bi3     | 3.305(2)  | 3.304(2)  | 3.311(2)  | 3.305(2)  | 3.301(2)  | 3.307(2)  | 3.305(2)  | 3.302(2)  | 3.298(2)  |
| Ca4/RE4—Bi2     | 3.466(2)  | 3.461(2)  | 3.469(2)  | 3.460(2)  | 3.459(2)  | 3.468(2)  | 3.458(2)  | 3.464(2)  | 3.450(2)  |
| Ca4/RE4—Bi3     | 3.830(2)  | 3.826(2)  | 3.827(2)  | 3.826(2)  | 3.816(2)  | 3.816(2)  | 3.819(2)  | 3.810(2)  | 3.819(2)  |
| Mn1—Bi2 × 4     | 2.8247(4) | 2.8209(4) | 2.8240(4) | 2.8234(4) | 2.8215(4) | 2.8272(4) | 2.8269(4) | 2.8269(4) | 2.8208(4) |
| Bi1—Bi4         | 3.3355(5) | 3.3335(6) | 3.3365(5) | 3.3349(6) | 3.3312(5) | 3.3334(6) | 3.3308(5) | 3.3330(5) | 3.3412(5) |
